# Supplementary material
Source: PubMed Central journal article supplement (PMC5181545)
Supplement: supp_piw051_piw051supp.pdf [file supp_piw051_piw051supp.pdf]

**Supplemental Figure 1. Mean deformation in specific subcortical clusters demonstrated to have associations with peak HIV viral load is correlated with cognitive performance in the thalamus and caudate**

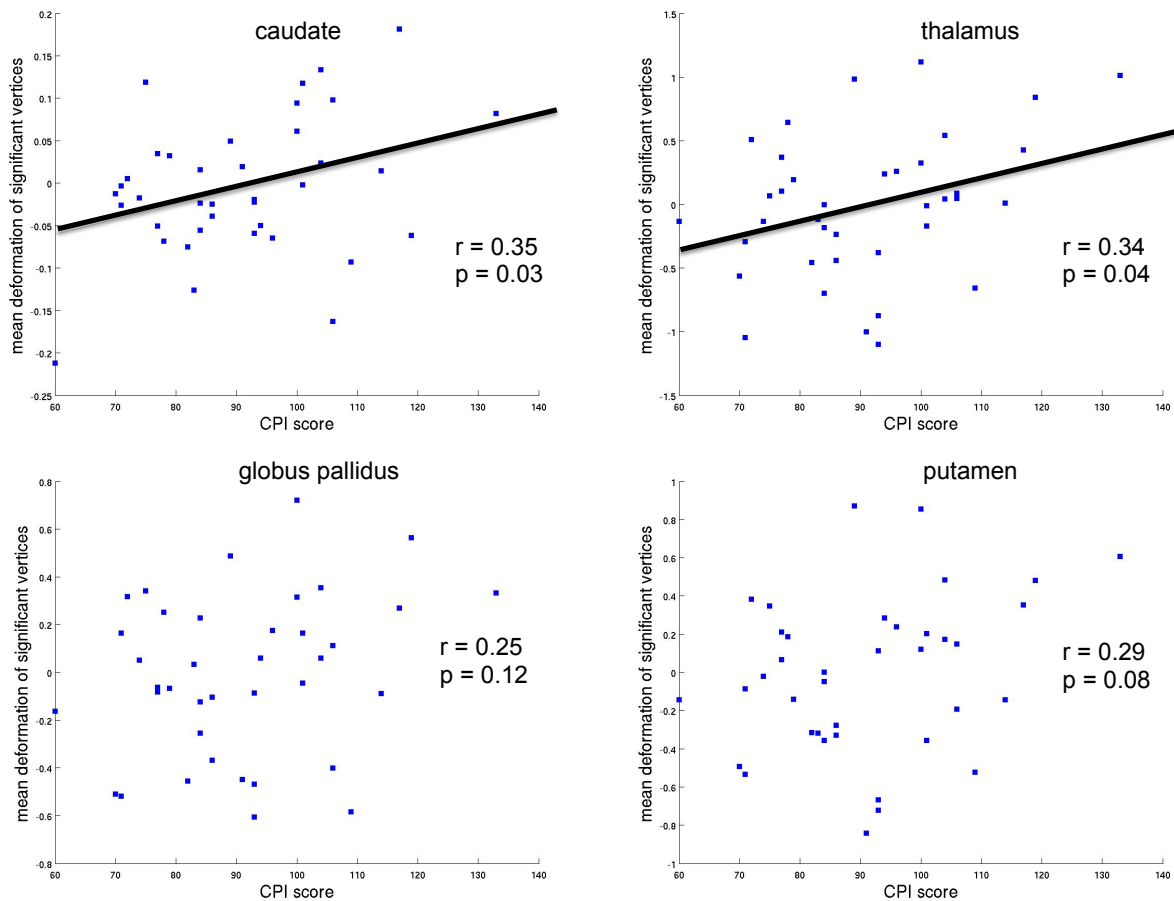

Mean deformation in the caudate, thalamus, globus pallidus, and putamen is related to cognitive performance. Best fit lines were added (black lines) to graphs with significant associations between cognitive proficiency index (CPI) score and mean deformation of clusters. The clusters were selected due to significant associations between deformity and peak HIV viral load.

**Supplemental Figure 2. Mean deformation in specific subcortical clusters demonstrated to have associations with nadir CD4% is correlated with cognitive performance in the thalamus**

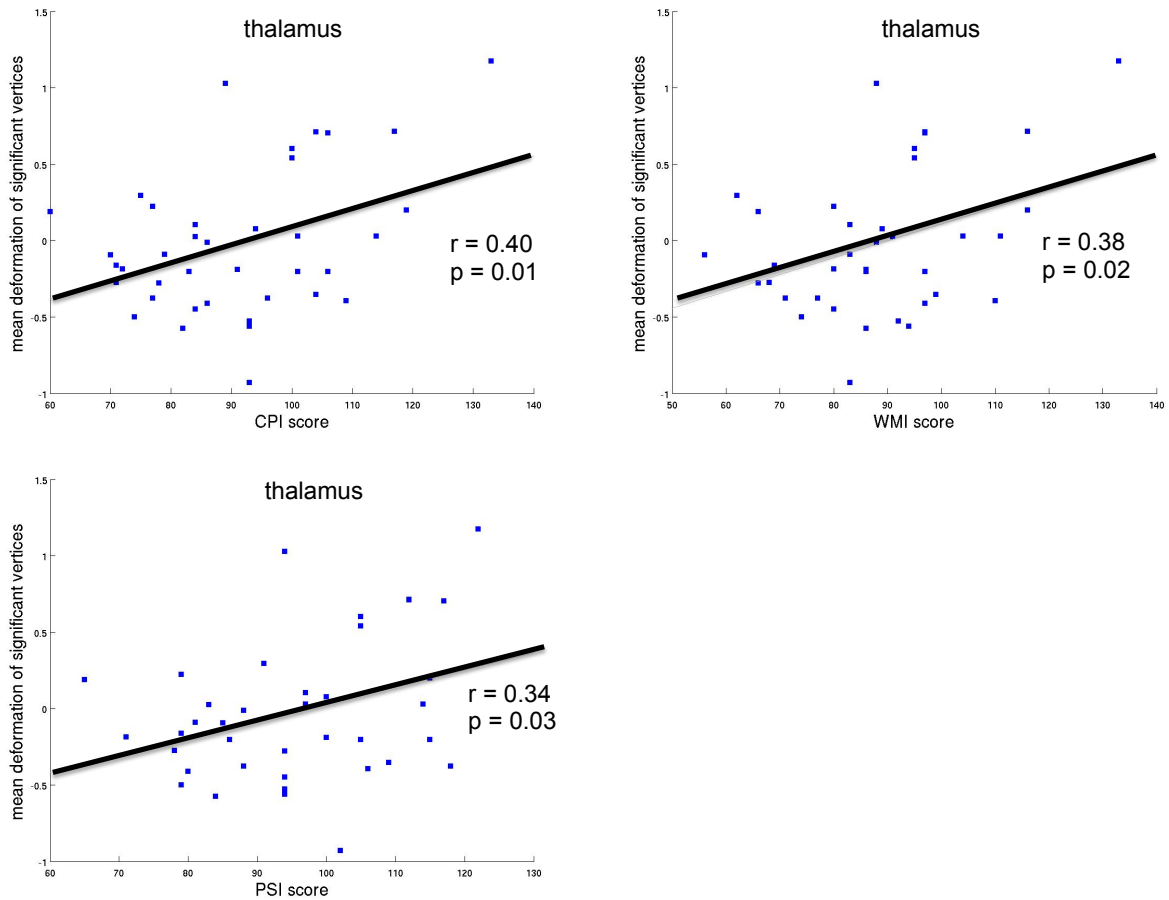

Mean deformation in the thalamus is related to cognitive performance. Best fit lines were added (black lines) to graph demonstrating significant associations between cognitive proficiency index (CPI) score and mean deformation of clusters. The clusters were selected due to significant associations between deformity and nadir CD4%.

**Supplemental Table 1: Association between subcortical volumes and historical HIV Disease Severity Markers in 40 Youth with Perinatally-acquired HIV**

| Volume            | <u>Predictor</u>         |         |                           |         |
|-------------------|--------------------------|---------|---------------------------|---------|
|                   | Peak HIV RNA load        |         | Nadir CD4%                |         |
|                   | F-Statistic<br>(1,32 df) | P-value | F-Statistic<br>(1, 32 df) | P-value |
| Caudate           | 1.19                     | 0.28    | 1.33                      | 0.26    |
| Putamen           | 2.88                     | 0.10    | 1.93                      | 0.17    |
| Nucleus Accumbens | 0.11                     | 0.74    | 0.72                      | 0.40    |
| Pallidum          | 1.42                     | 0.24    | 1.14                      | 0.29    |
| Thalamus          | 1.77                     | 0.19    | 3.78                      | 0.06    |
| Hippocampus       | 0.00                     | 0.98    | 0.74                      | 0.40    |
| Amygdala          | 0.03                     | 0.87    | 0.65                      | 0.43    |
